# Supplementary material
Source: PubMed Central journal article supplement (PMC3011023)
Supplement: NIHMS252446-supplement-1.pdf [file NIHMS252446-supplement-1.pdf]

Varlakhanova et al. Appendix Figure 1  
Supplemental information for reviewers

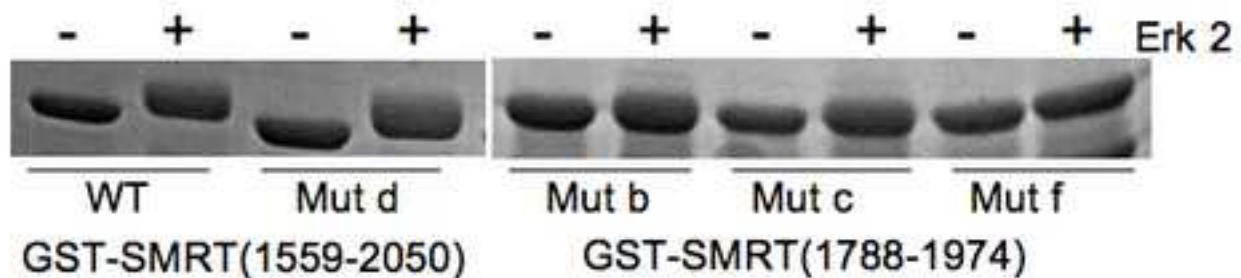

**A. Comparable levels of GST-SMRT proteins were used in our GST-pulldown experiments.** The SDS-PAGE electrophoretograms employed for phosphoimager quantification of  $^{35}\text{S}$ -SMRT binding were also stained with Coomassie blue to visualize the unlabeled, GST-SMRT proteins in the same lanes. Representative samples are shown (please note that Erk2 phosphorylation tends to widen the GST-SMRT bands without changing the total integrated amount of protein in each band).

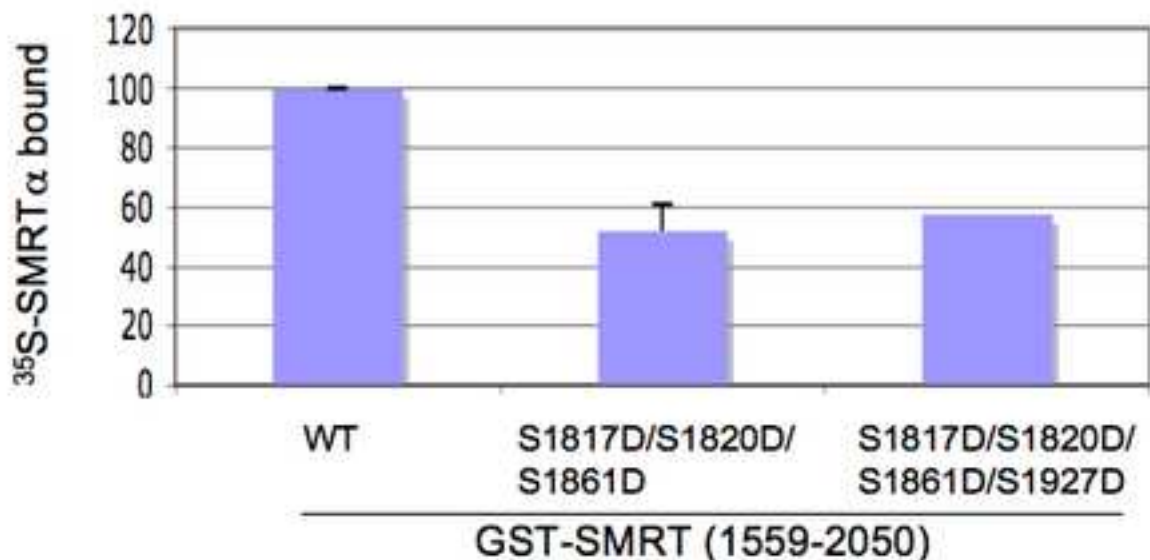

**B. Phospho-mimic amino acid substitutions parallel Erk phosphorylation by inhibiting the SMRT:SMRT interaction.** The GST-interaction experiments in Figure 5B were repeated, but using aspartic acid substitutions of the indicated serines instead of Erk2 treatment. WT, a triple, and a quadruple mutant are presented. Binding of WT was defined as 100%
